# Supplementary material for: Phenotypic and Cytogenetic Characterization of Mesenchymal Stromal Cells inDe NovoMyelodysplastic Syndromes
Source: Hindawi journal article supplement (doi:10.1155/2016/8012716), 2016-01-01
Supplement: f1 [file 8012716.f1.pdf]

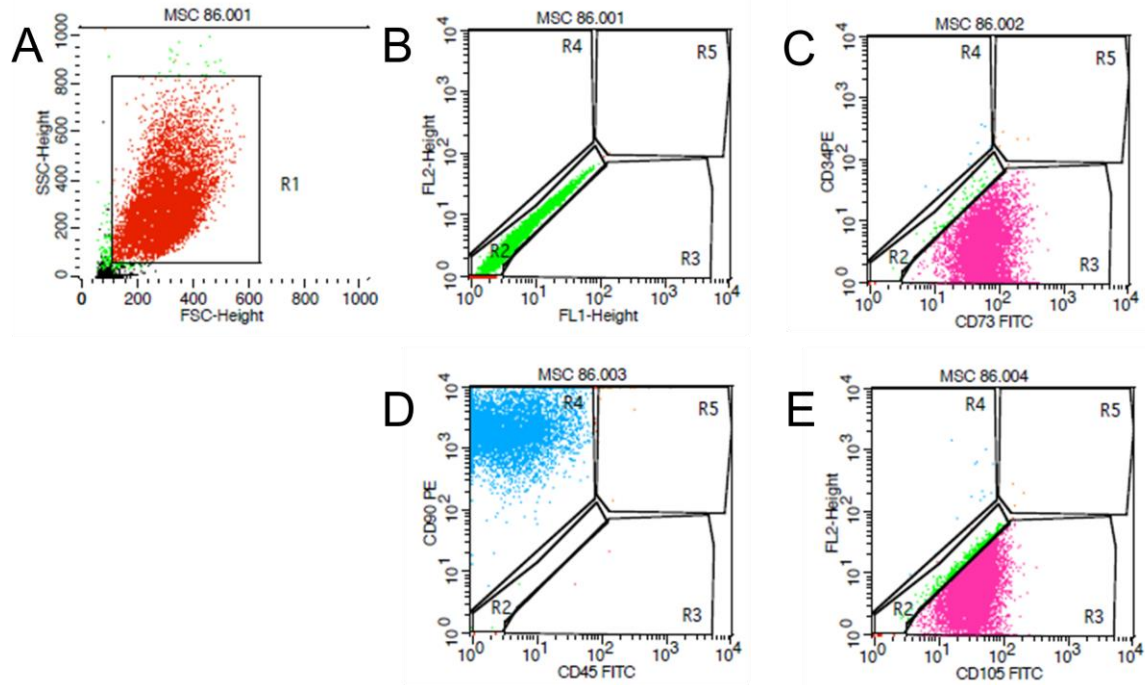

Supplementary Figure 1: Immunophenotypic characteristics of MSCs from a representative MDS patient. The forward scatter versus side scatter dot plot shows the gate of the MSC population (R1). The MDS-MSCs were positive for CD73(C-R3), CD90 (D-R4) and CD105 (E-R3) and were negative for CD34 (C-R4) and CD45 (D-R3) surface markers.

A

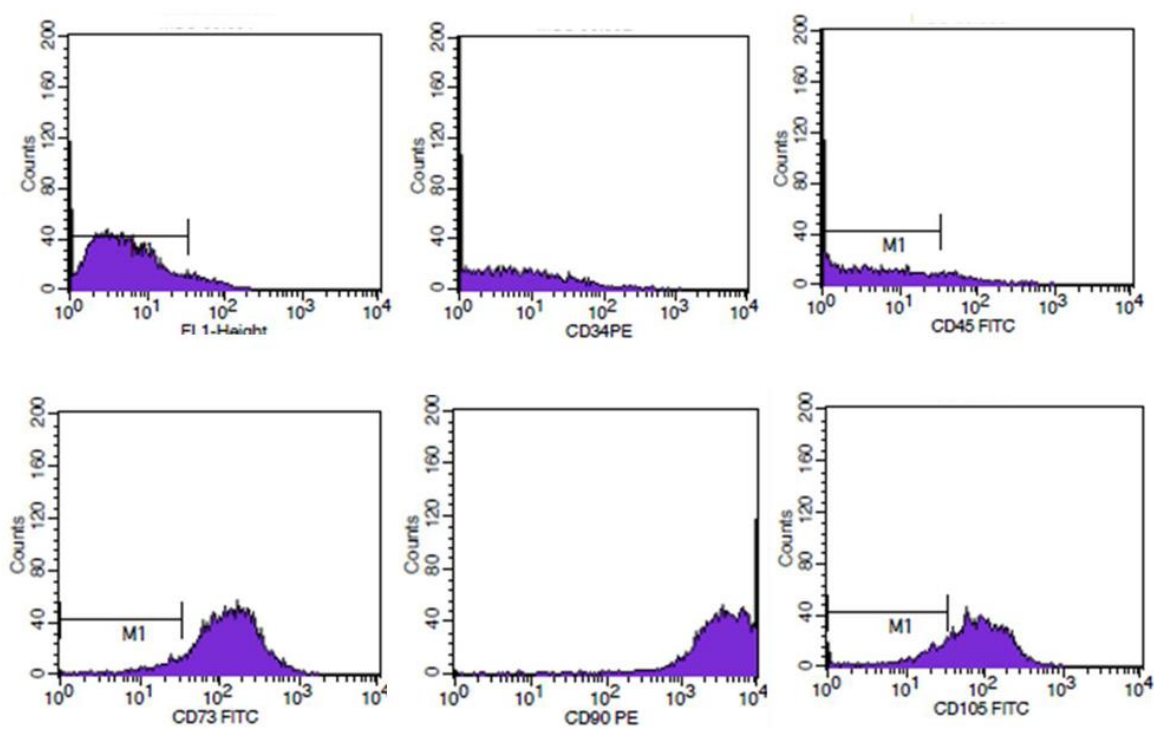

B

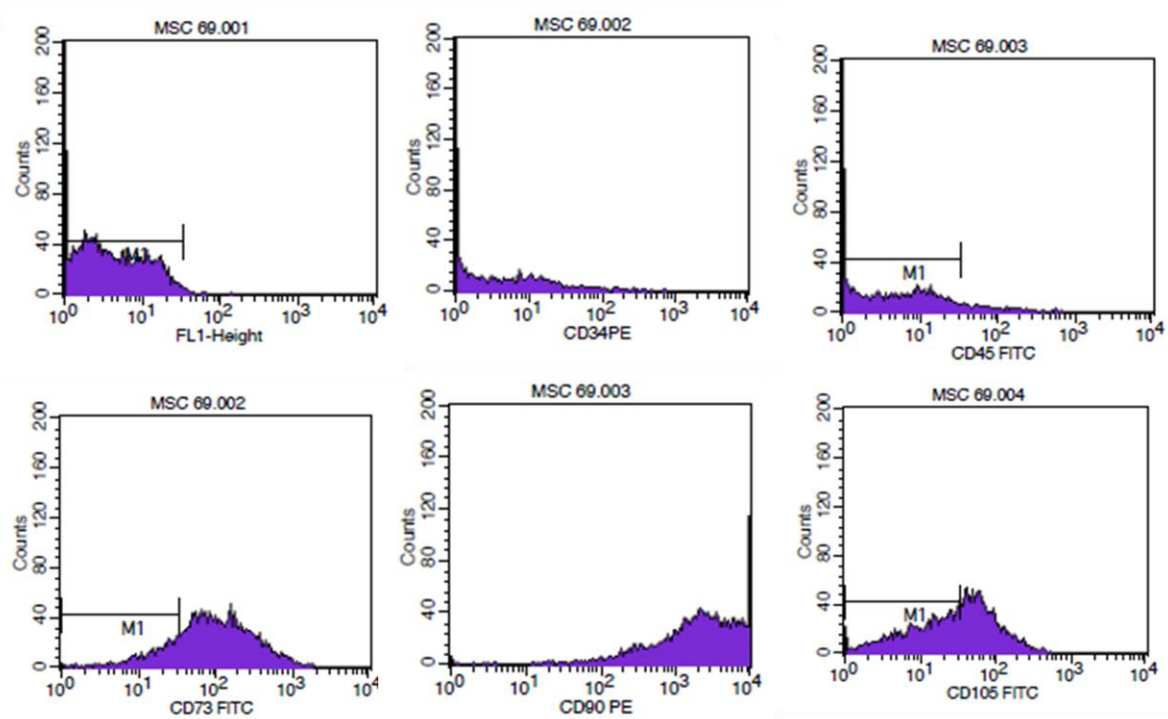

C

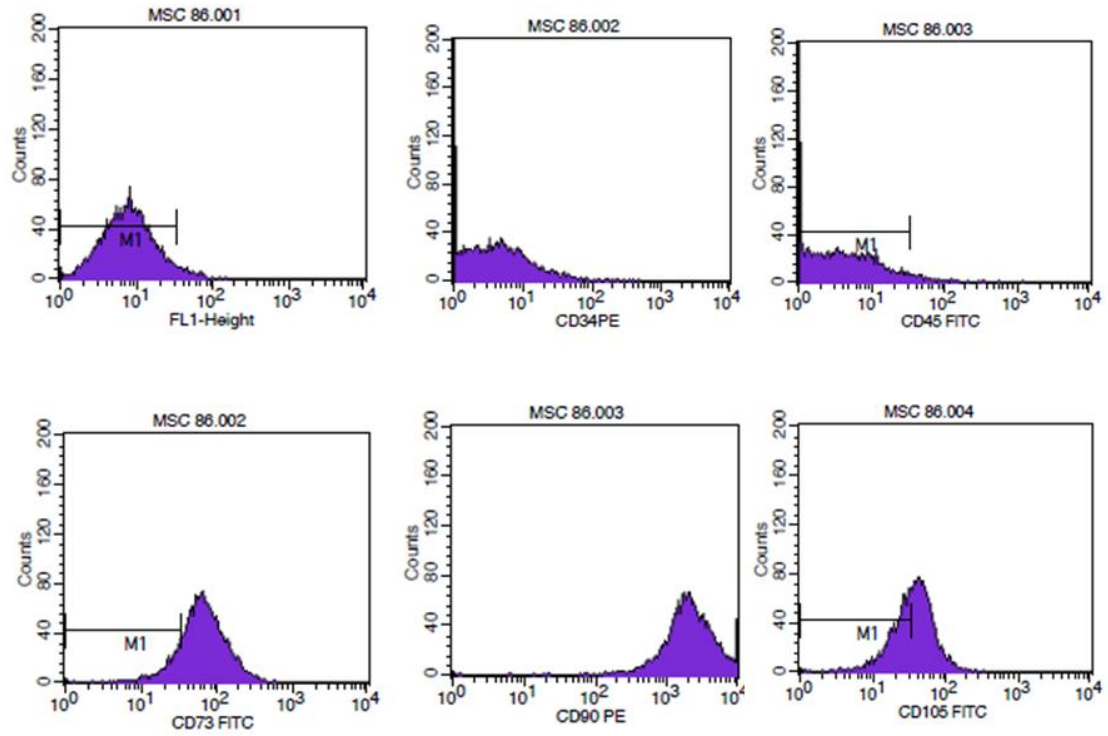

D

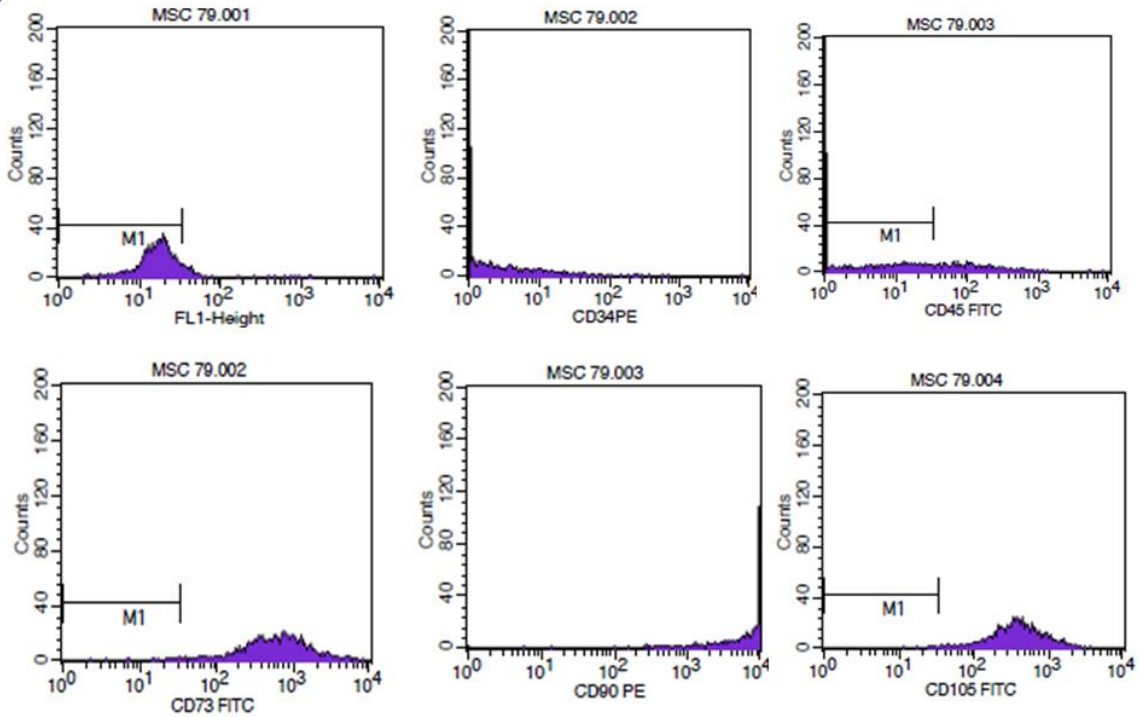

Supplementary Figure 2: Flowcytometric analysis of MSCs. Representative FACS plots of A-control MSCs, B-RCUD MSCs, C-RCMD MSCs and D-RAEB MSCs expressing CD markers CD34, C45, CD73, CD90 and CD105.

**A**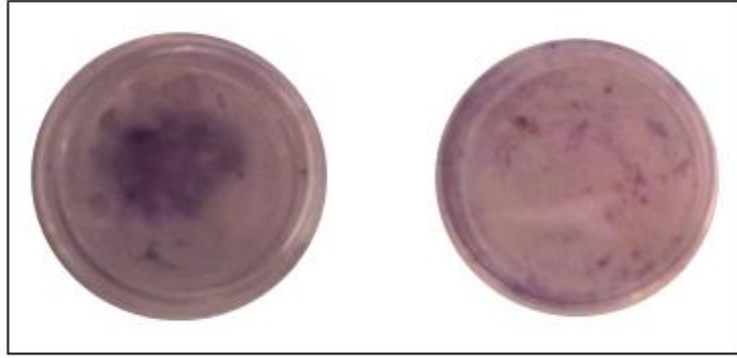**B**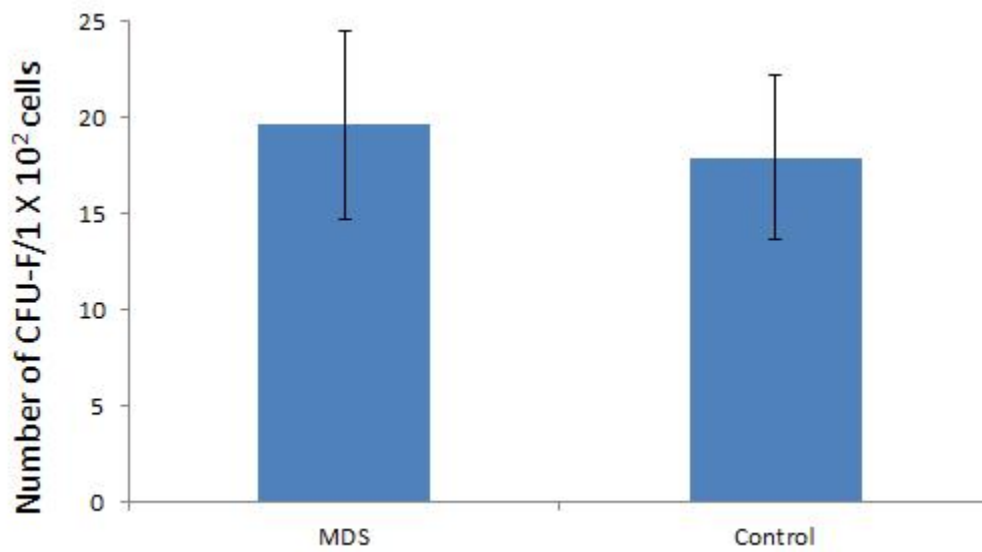

Supplementary Figure 3: A- CFU-F assay for MDS-MSCs and control-MSCs. B-Mean CFU-F frequency of MDS-MSCs was  $19.63 \pm 4.91$  (range: 7-41; n = 16) and that of controls was  $17.93 \pm 4.25$  (range: 8-35; n = 5). CFU-F frequencies of MDS-MSCs were not significantly different from that of control MSCs ( $p > 0.05$ ).
